# Supplementary material for: Porphyrobacter mercurialis sp. nov., isolated from a stadium seat and emended description of the genus Porphyrobacter
Source: PeerJ journal article supplement (doi:10.7717/peerj.1400), 2015-11-12
Supplement: SUPP_FIGv2.pdf [file SUPP_FIGv2.pdf]

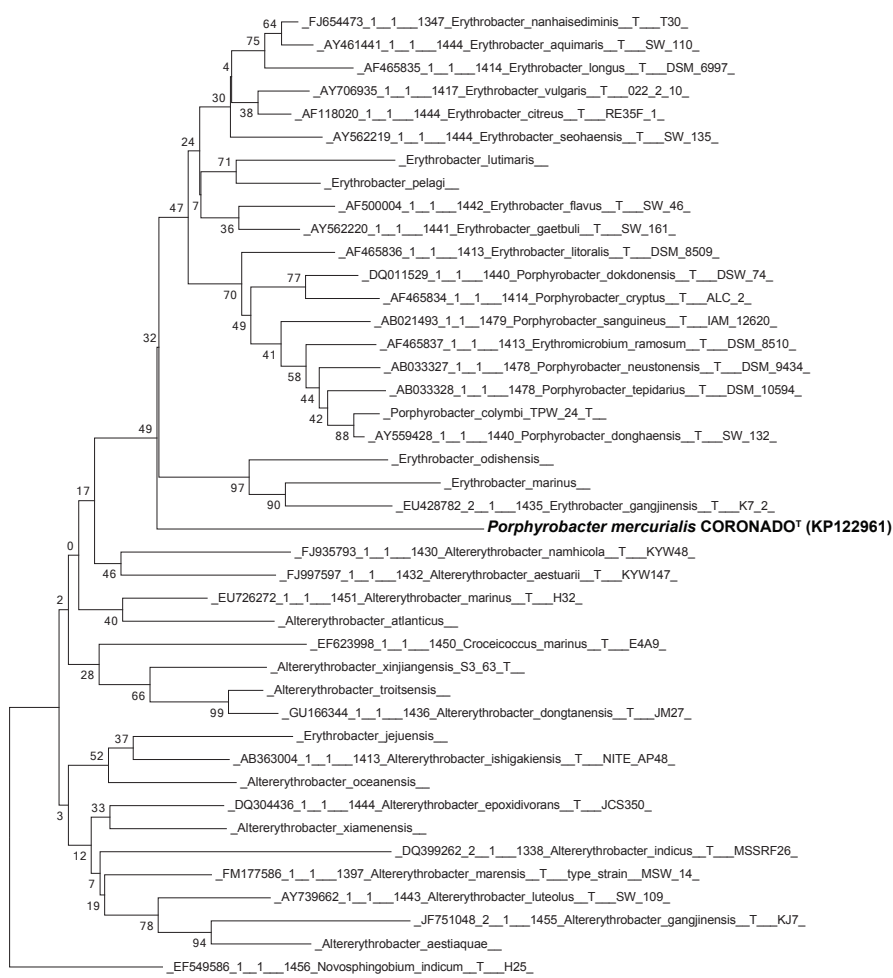

0.005
